# Supplementary material for: A two in one approach: renewable support and enhanced catalysis for sweetening using chicken feather bound cobalt(ii) phthalocyanine under alkali free environment
Source: Royal Society of Chemistry journal article supplement (doi:10.1039/c6ra06842a), 2016-01-01

## Supporting Information

### **A two in one approach: renewable support and enhanced catalysis for sweetening using chicken feather bound cobalt(II) phthalocyanine under alkali free environment**

Deepak K. Chauhan,<sup>a</sup> Padma L. Patnam,<sup>b</sup> Sudip K. Ganguly<sup>a</sup> and Suman L. Jain<sup>b\*</sup>

<sup>a</sup>*Refining Technology Division, CSIR-Indian Institute of Petroleum, Dehradun India 248005;*

Email: [sganguly@iip.res.in](mailto:sganguly@iip.res.in)

<sup>b</sup>*Chemical Sciences Division, CSIR-Indian Institute of Petroleum, Dehradun 248005, India*

Email : [sumanjain@iip.res.in](mailto:sumanjain@iip.res.in)

### **<sup>1</sup>H NMR of the products**

**Table 1, entry 1**

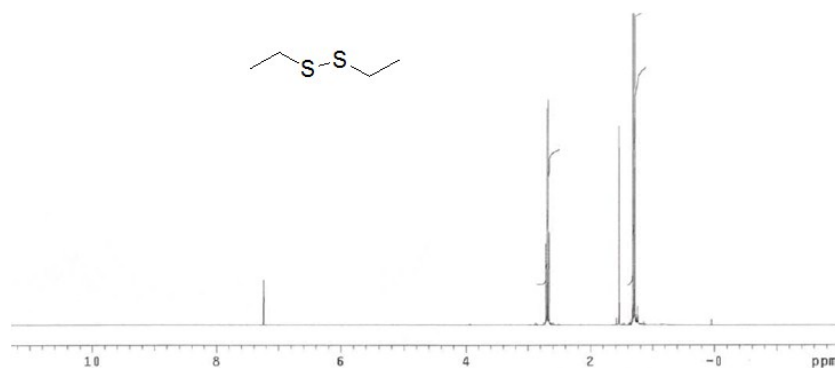

Table 1, entry 2

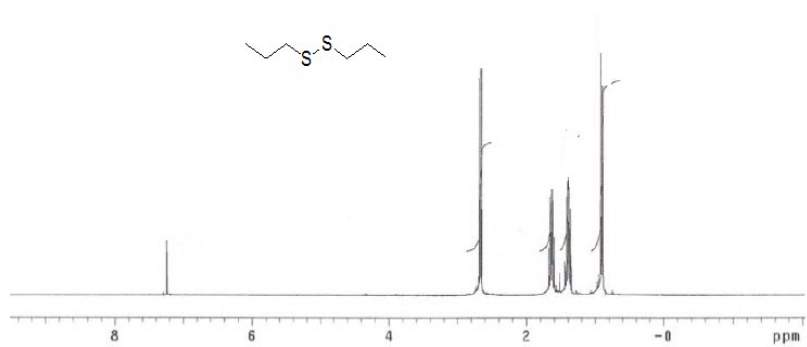

Table 1, entry 3

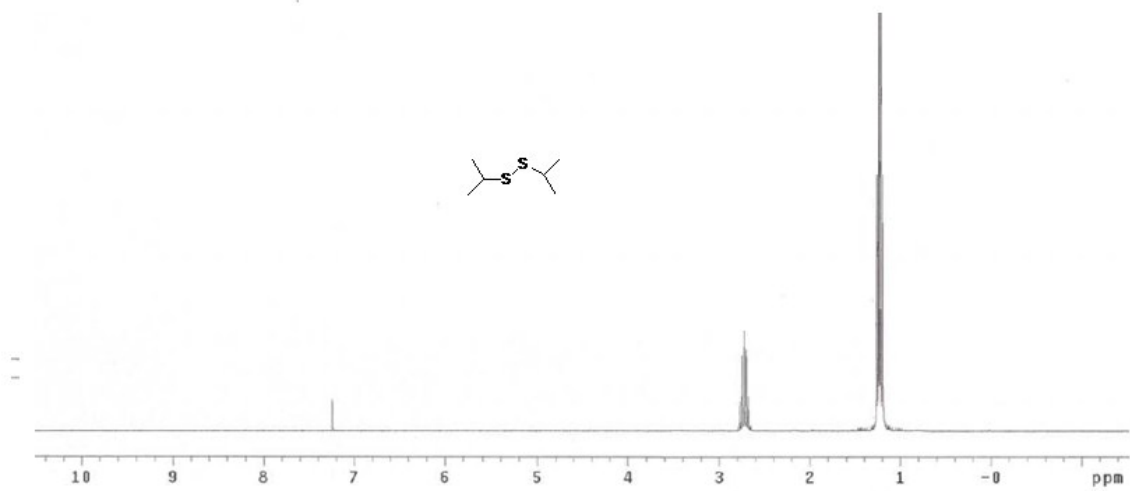

Table 1, entry 4

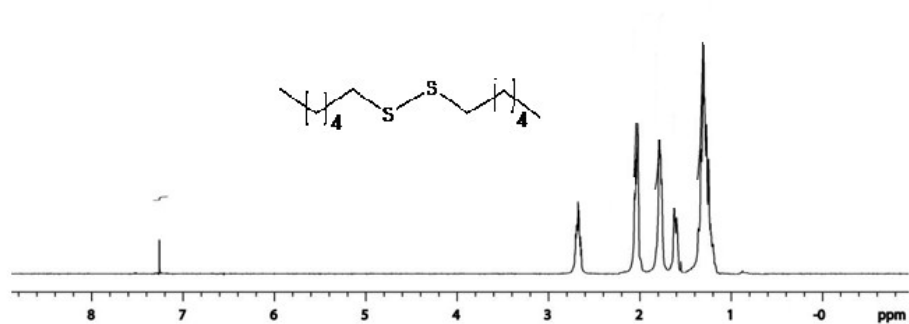

Table 1, entry 5

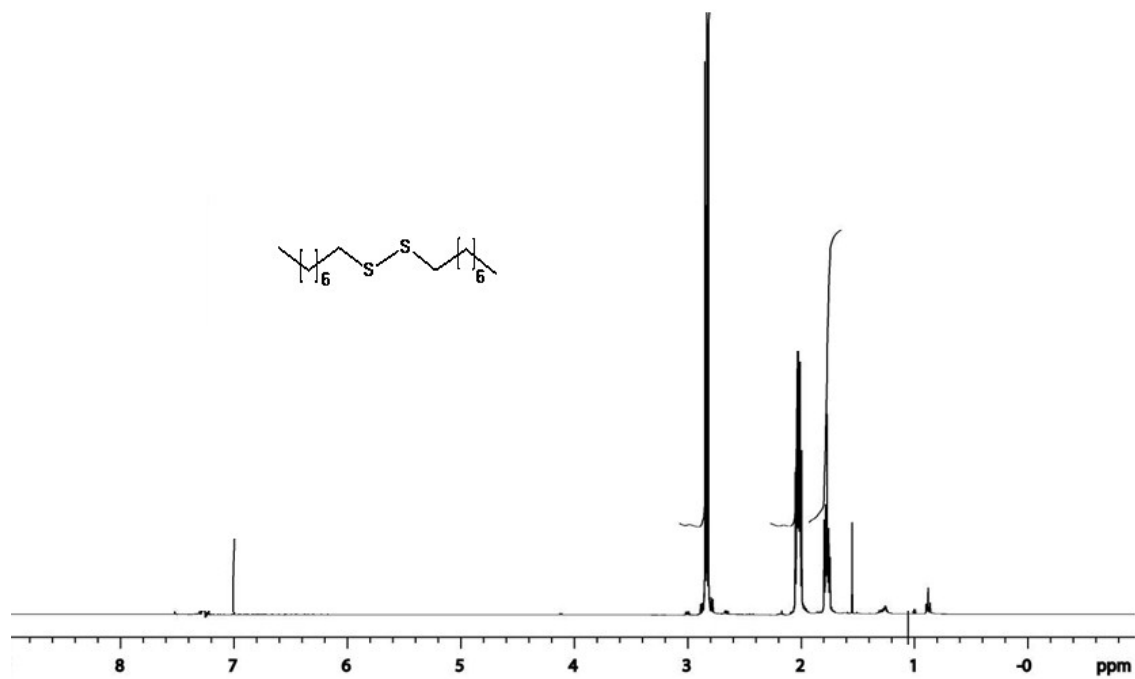

**Table 1, entry 7**

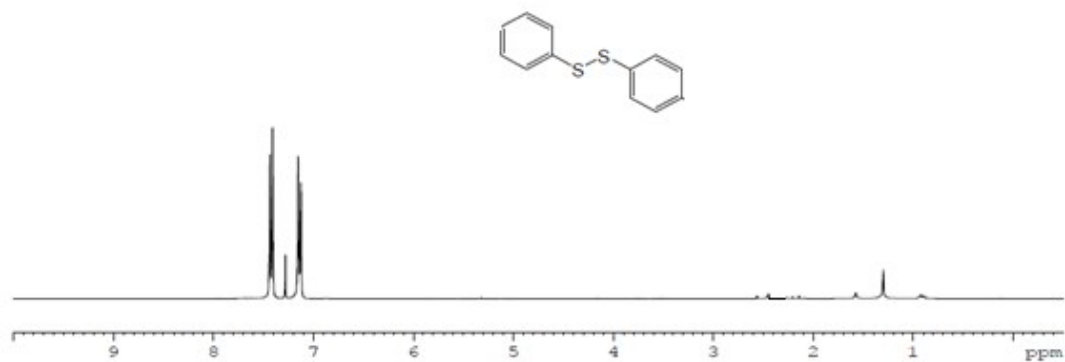

**Table 1, entry 8**

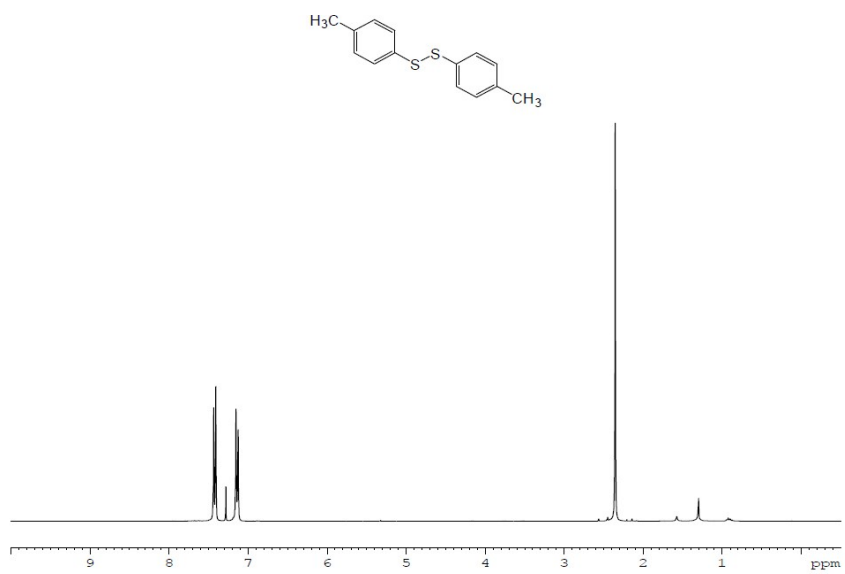

Table 1, entry 9

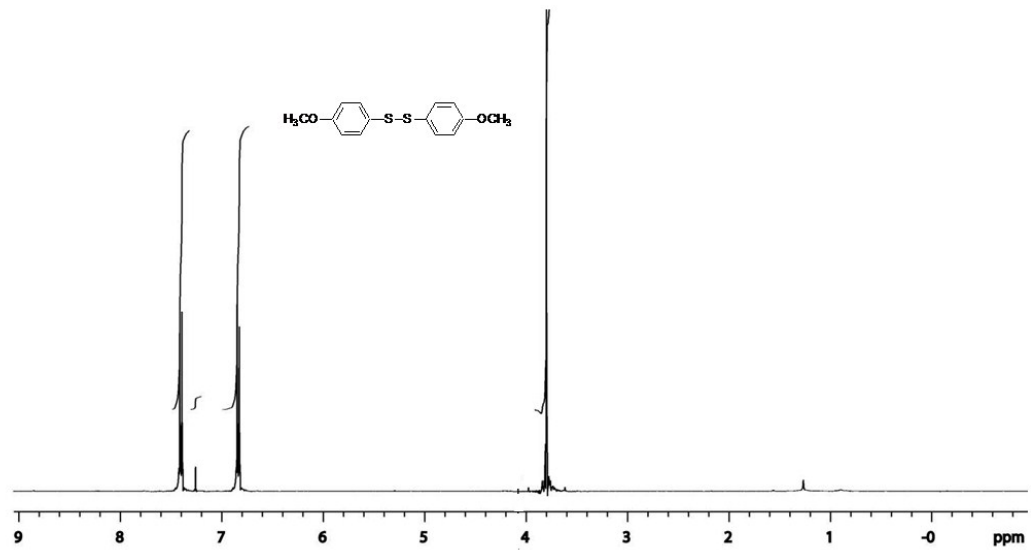

Table 1, entry 10

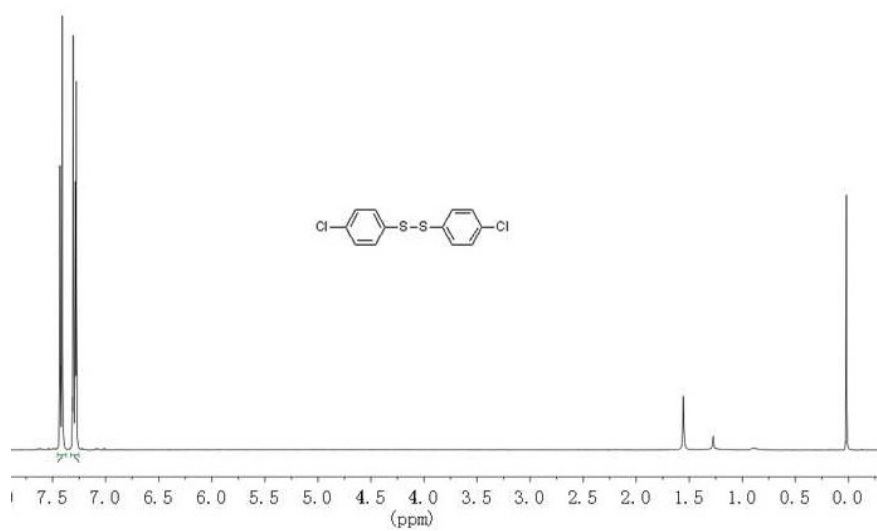

Table 1, entry 11

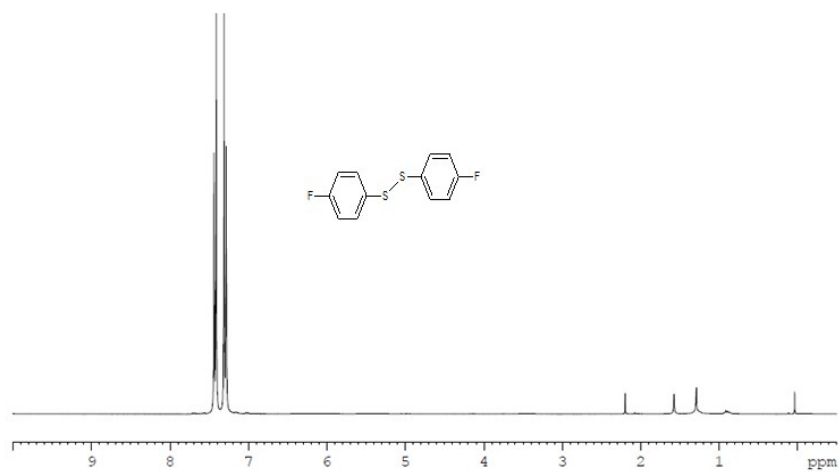

Table 1, entry 12

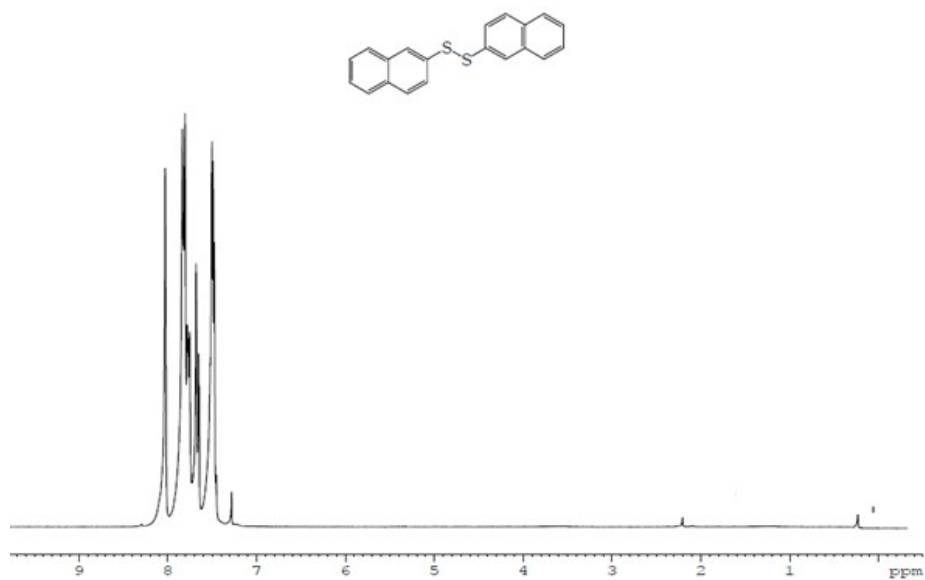

Supplement: c6ra06842a1.pdf [file c6ra06842a1.pdf]
